# Supplementary material for: Search for MicroRNAs Expressed by Intracellular Bacterial Pathogens in Infected Mammalian Cells
Source: PubMed Central journal article supplement (PMC4153649; doi:10.1371/journal.pone.0106434), 2014-09-03
Supplement: pone.0106434.s005.pdf [file pone.0106434.s005.pdf]

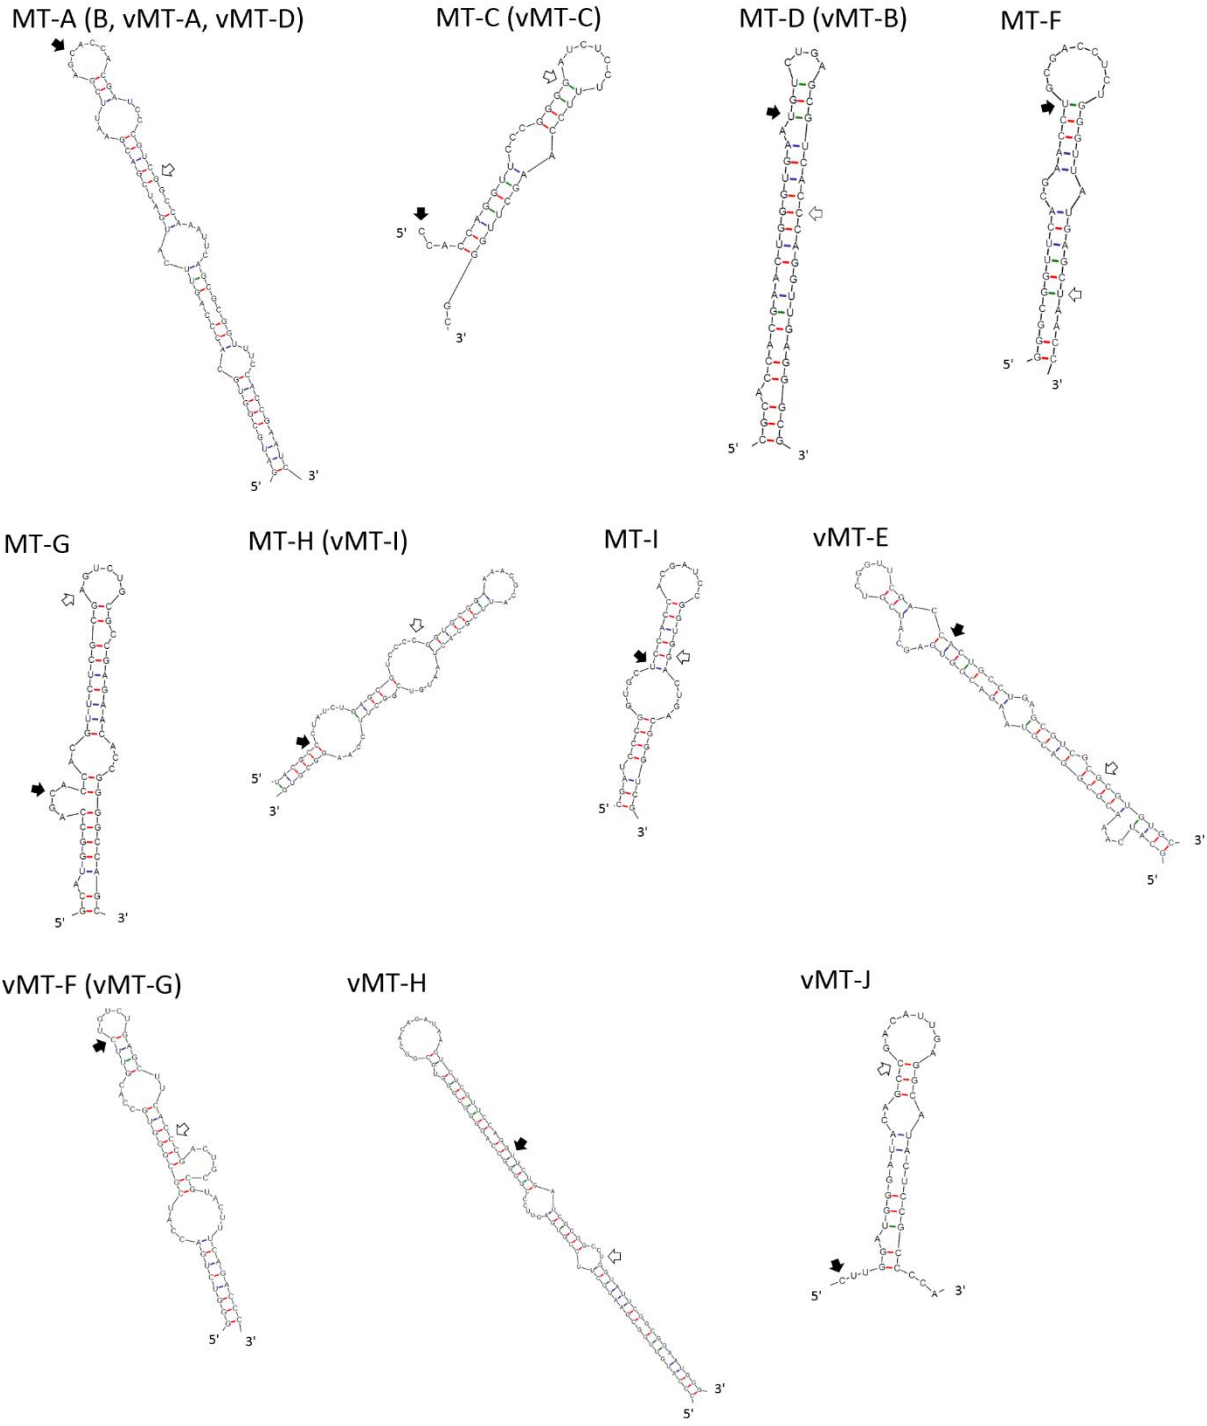

**Figure S5. Predicted secondary structures for small RNAs of *M. tuberculosis*.**

Predicted secondary structures and origin of small RNAs of *M. tuberculosis*, listed in Tables 5 and 6. The large black arrow and the white arrow indicate the 5' and 3' ends of the recovered small RNA, respectively.
