# Supplementary material for: Search for MicroRNAs Expressed by Intracellular Bacterial Pathogens in Infected Mammalian Cells
Source: PubMed Central journal article supplement (PMC4153649; doi:10.1371/journal.pone.0106434), 2014-09-03
Supplement: pone.0106434.s006.pdf [file pone.0106434.s006.pdf]

**Table S1. Small RNAs derived from the *M. marinum* MM-H stem-loop structure.**

| Strand | Position               | Length    | Sequence                 | Read count   |
|--------|------------------------|-----------|--------------------------|--------------|
| 5p     | 1746211-1746231        | 21        | GUCGAGGUCUCCAGAU CAGG    | 12           |
| 3p     | 1746245-1746265        | 21        | UCAUCUUCGGAAGACCUCGGC    | 272          |
|        | 1746245-1746266        | 22        | UCAUCUUCGGAAGACCUCGGCC   | 1814         |
|        | <b>1746245-1746267</b> | <b>23</b> | UCAUCUUCGGAAGACCUCGGCCC  | <b>16135</b> |
|        | 1746245-1746268        | 24        | UCAUCUUCGGAAGACCUCGGCCCC | 734          |

<sup>a</sup> The percentage representation in the RISC-associated small RNA library is shown for the most abundant MM-H read.
