# Supplementary material for: Search for MicroRNAs Expressed by Intracellular Bacterial Pathogens in Infected Mammalian Cells
Source: PubMed Central journal article supplement (PMC4153649; doi:10.1371/journal.pone.0106434), 2014-09-03
Supplement: pone.0106434.s007.pdf [file pone.0106434.s007.pdf]

**Table S2. Small RNAs derived from the MM-H homology region of *M. smegmatis*.**

| Strand | Position             | Length    | Sequence                 | Read count                                |
|--------|----------------------|-----------|--------------------------|-------------------------------------------|
| 5p     | 888853-888873        | 21        | GUCGAGGUCUUUCAGAUGGAU    | 56                                        |
|        | 888853-888874        | 22        | GUCGAGGUCUUUCAGAUGGAUG   | 82                                        |
|        | 888853-888875        | 23        | GUCGAGGUCUUUCAGAUGGAUGG  | 32                                        |
| 3p     | 888886-888906        | 21        | UCCAUCAUCGGAAGACCUCGA    | 375                                       |
|        | 888886-888907        | 22        | UCCAUCAUCGGAAGACCUCGAC   | 262                                       |
|        | 888886-888908        | 23        | UCCAUCAUCGGAAGACCUCGACC  | 704                                       |
|        | 888886-888909        | 24        | UCCAUCAUCGGAAGACCUCGACCC | 203                                       |
|        | 888888-888906        | 19        | CAUCAUCGGAAGACCUCGA      | 423                                       |
|        | 888888-888907        | 20        | CAUCAUCGGAAGACCUCGAC     | 264                                       |
|        | 888888-888908        | 21        | CAUCAUCGGAAGACCUCGACC    | 474                                       |
|        | 888888-888909        | 22        | CAUCAUCGGAAGACCUCGACCC   | 164                                       |
|        | 888888-888910        | 23        | CAUCAUCGGAAGACCUCGACCCC  | 76                                        |
|        | 888889-888906        | 18        | AUCAUCGGAAGACCUCGA       | 322                                       |
|        | 888889-888907        | 19        | AUCAUCGGAAGACCUCGAC      | 366                                       |
|        | <b>888889-888908</b> | <b>20</b> | AUCAUCGGAAGACCUCGACC     | <b>889</b><br><b>(0.006%)<sup>a</sup></b> |
|        | 888889-888909        | 21        | AUCAUCGGAAGACCUCGACCC    | 595                                       |
|        | 888889-888910        | 22        | AUCAUCGGAAGACCUCGACCCC   | 304                                       |
|        | 888889-888911        | 23        | AUCAUCGGAAGACCUCGACCCCU  | 98                                        |

<sup>a</sup> The percentage representation in the RISC-associated small RNA library is shown for the most abundant read.
